# Supplementary material for: Comprehensive Literature Review of Obstetric Outcomes and Fetal Risk during Pregnancy with Pseudoxanthoma Elasticum
Source: MDPI journal article supplement (doi:10.3390/jcm10112532), 2021-06-07
Supplement: s1 [file s1]

**Table S1. Obstetric and Fetal Outcomes in Relation to Pseudoxanthoma Elasticum.**

| Author                           | Year | Sample Size             | Maternal Age | Maternal/PXE Complications                                                                                              | Fetal Complications                                                                                                 | Labor/Delivery Complications                                                                                        | Impact on Child                                                                                                  |
|----------------------------------|------|-------------------------|--------------|-------------------------------------------------------------------------------------------------------------------------|---------------------------------------------------------------------------------------------------------------------|---------------------------------------------------------------------------------------------------------------------|------------------------------------------------------------------------------------------------------------------|
| Elejalde B, et al. [1]           | 1984 | 1                       | 30           | - increased number of septa and abnormal elastic tissue                                                                 | - deceleration of fetal growth post week 26<br>- heavy placental calcification                                      | - labor induced due to severe intrauterine growth retardation                                                       | - none; infant delivered at 36 weeks with normal growth by 6 wks                                                 |
| Viljoen D, et al. [2]            | 1987 | 20 (54 pregnancies)     | 15–64        | - abdominal striae in all patients (varying severity with multiparas and weight)<br>- hypertension in 7 pregnancies     | - 12 miscarriages (between 6–14 weeks, unspecified)<br>- 2 early terminations (due to psychiatric reasons)          | - none                                                                                                              | - none; 40 live births (3 preterm)<br>- 1 infant died at 4 days of age due to complex congenital cardiac anomaly |
| Mansat-Krzyzanoska E, et al. [3] | 1993 | 1                       |              | - skin lesion aggravation 2 years post partum                                                                           | - transient inflection of fetal growth curve with return to normal after maternal rest<br>- placental calcification | - none<br>- caesarean section at week 35                                                                            | - none; healthy infant delivered                                                                                 |
| Valenzano M, et al. [4]          | 2000 | 1                       | 29           | - skin lesion aggravation                                                                                               | - none                                                                                                              | - none<br>- caesarean section at week 35                                                                            | - none; healthy infant delivered                                                                                 |
| Gheduzzi D, et al. [5]           | 2001 | 29 (15 PXE, 14 control) | 25–37        | - 1 case of mild preeclampsia<br>- 1 case of hypertension<br>- 2 cases of first trimester spotting                      | - placental calcification                                                                                           | - none                                                                                                              | - none; all newborns healthy                                                                                     |
| Zachariah M, et al. [6]          | 2003 | 1                       | 25           | - worsened skin manifestation<br>- skin lesion aggravation<br>- prominent abdominal striae<br>- hypertension at week 38 | - none                                                                                                              | - labor induced due to pre-eclampsia<br>- caesarean section required because of secondary arrest at 5 cm dilatation | - none, healthy infant delivered                                                                                 |
| Bercovitch L, et al. [7]         | 2004 | 306 (795 pregnancies)   | 15–41        | - hypertension (10%)<br>- gastric bleeding (<1%)<br>- retinal complication (<1%)<br>- worsened skin manifestation (12%) | - 8 stillbirths (1 due to maternal PXE GI bleeding)                                                                 | - caesarean section (13% of deliveries)                                                                             | - none; 660 live births                                                                                          |
| Xiromeritis P, et al. [8]        | 2006 | 1 (2 pregnancies)       | 28           | - worsened skin manifestation on neck                                                                                   | - placental calcification                                                                                           | - vacuum extraction for first child                                                                                 | - none; both infants delivered and healthy                                                                       |
| Fahri D, et al. [9]              | 2006 | 1                       | 25           | - worsening of cutaneous lesions<br>- development of severe angioid streaks                                             | - none                                                                                                              | - caesarean section due to angioid streaks                                                                          | - not reported                                                                                                   |
| Goral V, et al. [10]             | 2007 | 1                       | 28           | - acute gastrointestinal hemorrhage (patient has extensive history of GI bleeding)                                      | - none reported                                                                                                     | - none reported                                                                                                     | - not reported                                                                                                   |
| Ching Tan W, et al. [11]         | 2008 | 1                       | 37           | - none                                                                                                                  | - markedly echogenic placenta due to extensive calcification                                                        | - none<br>- elective caesarean section                                                                              | - none; healthy infant delivered at 38 weeks with normal growth at 6 months                                      |
| Tanioka M, et al. [12]           | 2014 | 1                       | 26           | - none                                                                                                                  | - severe placental calcification at week 30                                                                         | - none                                                                                                              | - none; healthy infant delivered at 39 weeks                                                                     |
| Drue HC, et al. [13]             | 2014 | 1                       | 36           | - maternal hemorrhage at 27 weeks                                                                                       | - hyperechogenic placental calcification                                                                            | - caesarean section due to maternal bleeding at 27 weeks                                                            | - both twins suffered from intraventricular hemorrhage due to maternal bleeding                                  |

|                            |      |    |     |                                                                                                                                       |                |                |                |
|----------------------------|------|----|-----|---------------------------------------------------------------------------------------------------------------------------------------|----------------|----------------|----------------|
| Veiga-Lopez A, et al. [14] | 2020 | 48 | 40+ | - multiparous women (>2 births) had significantly higher normalized lower limb artery calcification score compared to uni/nulliparous | - not reported | - not reported | - not reported |
|----------------------------|------|----|-----|---------------------------------------------------------------------------------------------------------------------------------------|----------------|----------------|----------------|

## References

1. Elejalde, B.R.; De Elejalde, M.M.; Samter, T.; Burgess, J.; Lombardi, J.; Gilbert, E.F.; Opitz, J.M.; Reynolds, J.F. Manifestations of pseudoxanthoma elasticum during pregnancy: A case report and review of the literature. *Am. J. Med. Genet.* **1984**, *18*, 755–762, doi:10.1002/ajmg.1320180422.
2. Viljoen, D.L.; Beatty, S.; Beighton, P. The obstetric and gynaecological implications of pseudoxanthoma elasticum. *BJOG Int. J. Obstet. Gynaecol.* **1987**, *94*, 884–888, doi:10.1111/j.1471-0528.1987.tb03760.x.
3. Mansat-Krzyzanowska, E.; Sagot, P.; Le Neel, N.; Stalder, J.F. Pseudoxanthome élastique et grossesse [Pseudoxanthoma elasticum and pregnancy]. *Ann. Dermatol. Venereol.* **1993**, *120*, 391–394.
4. Valenzano, M.; Corticelli, A.; Podestà, M.; Nicoletti, L.; Saffioti, S.; Derchi, L. Pseudoxanthoma elasticum and pregnancy: A case report. *Clin. Exp. Obstet. Gynecol.* **2000**, *27*, 11214955.
5. Gheduzzi, D.; Taparelli, F.; Quaglino, D.; Di Rico, C.; Bercovitch, L.; Terry, S.; Singer, D.; Pasquali-Ronchetti, I. The Placenta in Pseudoxanthoma Elasticum: Clinical, Structural and Immunochemical Study. *Placenta* **2001**, *22*, 580–590, doi:10.1053/plac.2001.0687.
6. Zachariah, M.; Thomas, S.B.; Stokes, I. Pseudoaxanthoma elasticum and pregnancy. *J. Obstet. Gynaecol.* **2003**, *23*, 433–434, doi:10.1080/0144361031000122606.
7. Bercovitch, L.; Leroux, T.; Terry, S.; Weinstock, M. Pregnancy and obstetrical outcomes in pseudoxanthoma elasticum. *Br. J. Dermatol.* **2004**, *151*, 1011–1018, doi:10.1111/j.1365-2133.2004.06183.x.
8. Xiromeritis, P.; Valembois, B. Pseudoxanthoma elasticum and pregnancy. *Arch. Gynecol. Obstet.* **2005**, *273*, 253–254, doi:10.1007/s00404-005-0075-1.
9. Farhi, D.; Descamps, V.; Picard, C.; Mahieu-Caputo, D.; Doan, S.; Crickx, B. Is pseudoxanthoma elasticum with severe angioid streaks an indication for Caesarean section? *J. Eur. Acad. Dermatol. Venereol.* **2006**, *20*, 1361–1362, doi:10.1111/j.1468-3083.2006.01717.x.
10. Goral, V.; Demir, D.; Tuzun, Y.; Keklikci, U.; Buyukbayram, H.; Bayan, K.; Uyar, A. Pseudoxantoma elasticum, as a repetitive upper gastrointestinal hemorrhage cause in a pregnant woman. *World J. Gastroenterol.* **2007**, *13*, 3897–3899, doi:10.3748/wjg.v13.i28.3897.
11. Tan, W.C.; Rodeck, C.H. Placental calcification in pseudoxanthoma elasticum. *Ann. Acad. Med. Singap.* **2008**, *37*, 598–600.
12. Tanioka, M.; Utani, A.; Tamura, H.; Yoshimura, N.; Kashiwagi, N.; Kondo, E.; Konishi, I.; Miyachi, Y. Calcification of the placenta in a woman with pseudoxanthoma elasticum with a mutation of the ABCC6 gene. *J. Dermatol.* **2014**, *41*, 189–191, doi:10.1111/1346-8138.12360.
13. Drue, H.C.; Mogensen, H.; Olesen, A.W. Pregnancy jeopardized by pseudoxanthoma elasticum. *Ugeskr. Laeger.* 2014 Oct 6;176(41):V04140206. Danish. PMID: 25331665.
14. Veiga-Lopez, A.; Sethuraman, V.; Navasolava, N.; Makela, B.; Olomu, I.; Long, R.; Van De Wetering, K.; Martin, L.; Aranyi, T.; Szeri, F. Plasma Inorganic Pyrophosphate Deficiency Links Multiparity to Cardiovascular Disease Risk. *Front. Cell Dev. Biol.* **2020**, *8*, 573727, doi:10.3389/fcell.2020.573727.
